# Supplementary material for: A New Dual-Mode GEP Prediction Algorithm Based on Irregularity and Similar Period
Source: Hindawi journal article supplement (doi:10.1155/2021/3594271), 2021-09-16
Supplement: f1 [file 3594271.f1.zip]

Archive with 2 entries (2 files):
- 3594271.f1/1.txt
- 3594271.f1/2.txt
