# Supplementary material for: A New Dual-Mode GEP Prediction Algorithm Based on Irregularity and Similar Period
Source: Hindawi journal article supplement (doi:10.1155/2021/3594271), 2021-09-16
Supplement: f1 [file 3594271.f1.zip › 3594271.f1/1.txt]

Price of leek in Jiangnan agricultural and sideline products market,Guangzhou, Guangdong Province.
Date	Number Price/��
2020/1/1	1	7.4
	2	7.0,
	3	6.6
	4	6.7
	5	6.6
	6	6.7
	7	6.6
	8	6.2
	9	6.2
	10	6.3
	11	6.2
	12	6.3
	13	6.2
	14	6.5
	15	6.2
	16	6
	17	6.1
	18	6.2
	19	5.8
	20	5.9
	21	6
	22	6.1
	23	6.2
	24	6.4
	25	6.5
	26	6.8
	27	7
	28	7.2
	29	7.2
	30	7
	31	7
	32	7.2
	33	6.8
	34	6.5
	35	6.5
	36	6
	37	6
	38	6.5
	39	6.5
	40	6
	41	5.9
	42	5.8
	43	5.7
	44	6
	45	5.9
	46	5.8
	47	5.7
	48	5.5
	49	5.4
	50	5.3
	51	5
	52	5.1
	53	5
	54	5.1
	55	5
	56	5.1
	57	5
	58	5
	59	5.1
	60	4.2
	61	4
	62	3.8
	63	4
	64	4.2
	65	4.2
	66	4.2
	67	4.5
	68	4.5
	69	4.2
	70	4
	71	4
	72	4
	73	4
	74	4
	75	4
	76	3.9
	77	4
	78	3.9
	79	3.9
	80	4
	81	3.9
	82	3.9
	83	4
	84	3.9
	85	4
	86	4.2
	87	4
	88	4.2
2020/4/1	89	4.4
	90	4.6
	91	5
	92	5
	93	5
	94	4.9
	95	5
	96	5
	97	5
	98	4.85
	99	4.85
	100	4.9
	101	4.8
	102	4.8
	103	4.85
	104	4.85
	105	4.9
	106	4.8
	107	4.9
2020/4/20	108	4.8
