# Supplementary material for: A New Dual-Mode GEP Prediction Algorithm Based on Irregularity and Similar Period
Source: Hindawi journal article supplement (doi:10.1155/2021/3594271), 2021-09-16
Supplement: f1 [file 3594271.f1.zip › 3594271.f1/2.txt]

The sunspot detection data values
Year	Value
1770 8.3,
	18.3,
	26.7,
	38.3,
	60.0,
	96.7,
	48.3,
	33.3,
	16.7,
	13.3,
	5.0,
	0.0,
	0.0,
	3.3,
	18.3,
	45.0,
	78.3,
	105.0,
	100.0,
	65.0,
	46.7,
	43.3,
	36.7,
	18.3,
	35.0,
	66.7,
	130.0,
	203.3,
	171.7,
	121.7,
	78.3,
	58.3,
	18.3,
	8.3,
	26.7,
	56.7,
	116.7,
	135.0,
	185.0,
	168.3,
	121.7,
	66.7,
	33.3,
	26.7,
	8.3,
	18.3,
	36.7,
	66.7,
	100.0,
	134.8,
	139.0,
	79.5,
	79.7,
	51.2,
	20.3,
	16.0,
	17.0,
	54.0,
	79.3,
	90.0,
	104.8,
	143.2,
	102.0,
	75.2,
	60.7,
	34.8,
	19.0,
	63.0,
	116.3,
	176.8,
	168.0,
	136.0,
	110.8,
	58.0,
	51.0,
	11.7,
	33.0,
	154.2,
	257.3,
	209.8,
	141.3,
	113.5,
	64.2,
	38.0,
	17.0,
	40.2,
	138.2,
	220.0,
	218.2,
	196.8,
	149.8,
	111.0,
	100.0,
	78.2,
	68.3,
	35.5,
	26.7,
	10.7,
	6.8,
	11.3,
	24.2,
	56.7,
	75.0,
	71.8,
	79.2,
	70.3,
	46.8,
	16.8,
	13.5,
	4.2,
	0.0,
	2.3,
	8.3,
	20.3,
	23.2,
	59.0,
	76.3,
	68.3,
	52.9,
	38.5,
	24.2,
	9.2,
	6.3,
	2.2,
	11.4,
	28.2,
	59.9,
	83.0,
	108.5,
	115.2,
	117.4,
	80.8,
	44.3,
	13.4,
	19.5,
	85.8,
	192.7,
	227.3,
	168.7,
	143.0,
	105.5,
	63.3,
	40.3,
	18.1,
	25.1,
	65.8,
	102.7,
	166.3,
	208.3,
	182.5,
	126.3,
	122.0,
	102.7,
	74.1,
	39.0,
	12.7,
	8.2,
	43.4,
	104.4,
	178.3,
	182.2,
	146.6,
	83.5,
	89.2,
	57.8,
	30.7,
	13.9,
	62.8,
	123.6,
	232.0,
	185.3,
	169.2,
	110.1,
	74.5,
	28.3,
	18.9,
	20.7,
	5.7,
	10.0,
	53.7,
	90.5,
	99.0,
	106.1,
	105.8,
	86.3,
	42.4,
	21.8,
	11.2,
	10.4,
	11.8,
	59.5,
	142.0,
	130.0,
	106.6,
	69.4,
	43.8,
	44.4,
	20.2,
	15.7,
	4.6,
	8.5,
	40.8,
	70.1,
	105.5,
	90.1,
	102.8,
	80.9,
	73.2,
	30.9,
	9.5,
	6.0,
	2.4,
	16.1,
	79.0,
	95.0,
	173.6,
	134.6,
	105.7,
	62.7,
	43.5,
	23.7,
	9.7,
	27.9,
	74.0,
	106.5,
	114.7,
	129.7,
	108.2,
	59.4,
	35.1,
	18.6,
	9.2,
	14.6,
	60.2,
	132.8,
	190.6,
	182.6,
	148.0,
	113.0,
	79.2,
	50.8,
	27.1,
	16.1,
	55.3,
	154.3,
	214.7,
	193.0,
	190.7,
	118.9,
	98.3,
	45.0,
	20.1,
	6.6,
	54.2,
	200.7,
	269.3,
	261.7,
	225.1,
	159.0,
	76.4,
	53.4,
	39.9,
	15.0,
	22.0,
	66.8,
	132.9,
	150.0,
	149.4,
	148.0,
	94.4,
	97.6 ,
	54.1,
	49.2,
	22.5,
	18.4,
	39.3,
	131.0,
	220.1,
	218.9,
	198.9,
	162.4,
	91.0,
	60.5,
	20.6,
	14.8,
	33.9,
	123.0,
	211.1,
	191.8,
	203.3,
	133.0,
	76.1,
	44.9,
	25.1,
	11.6,
	28.9,
	88.3,
	136.3,
	173.9,
	170.4,
	163.6,
	99.3,
	65.3,
	45.8,
	24.7,
	12.6,
	4.2,
	4.8,
	24.9,
	80.8,
	84.5,
	94.0,
	113.3,
	69.8,
	39.8,
	21.7,
2018	7.0,
